# Supplementary material for: GenePattern 2.0
Source: Springer Nature journal article supplement (doi:10.1038/ng0506-500), 2006-04-27
Supplement: 41588_2006_BFng0506500_MOESM2_ESM.pdf [file 41588_2006_BFng0506500_MOESM2_ESM.pdf]

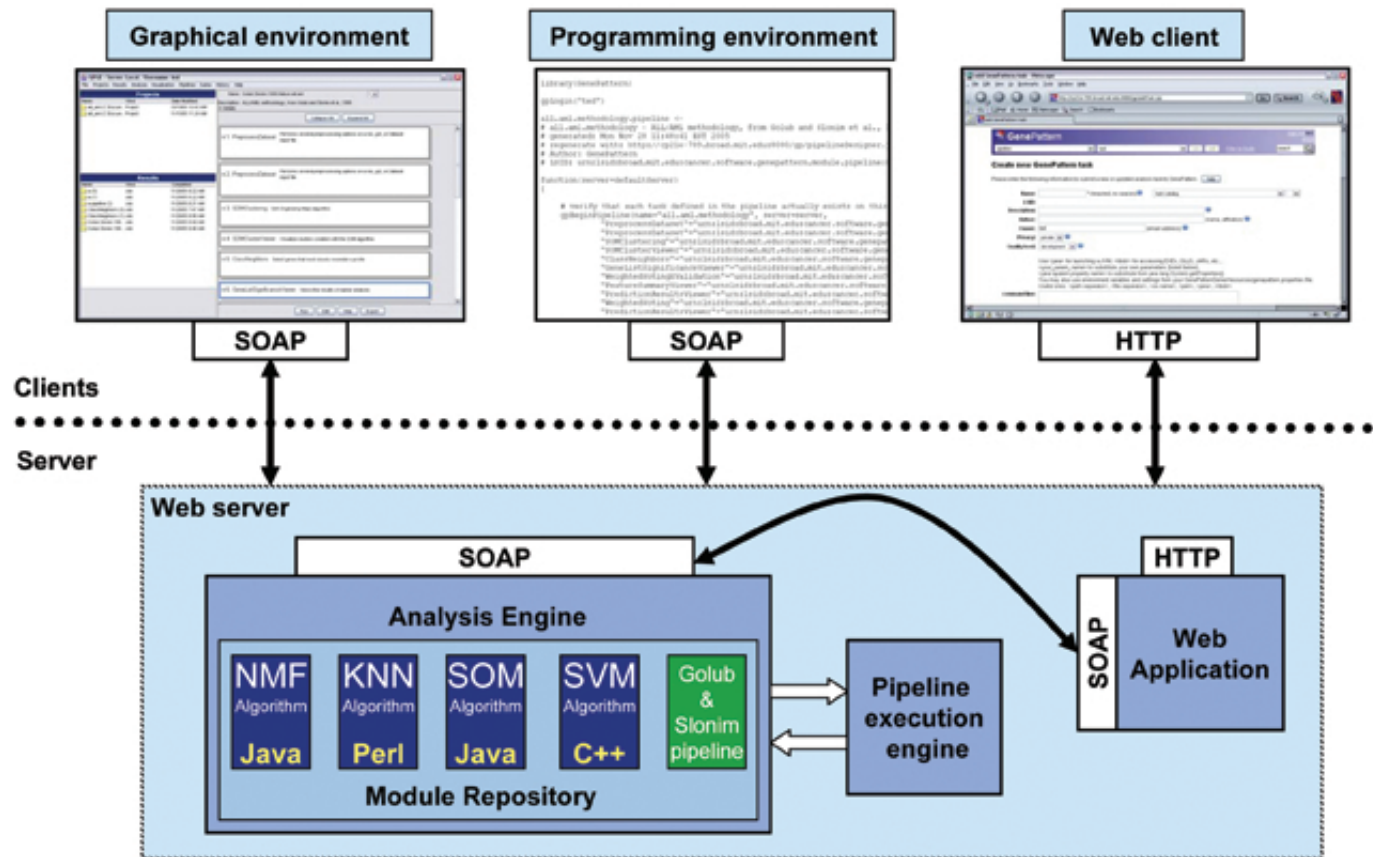

**Supplementary Fig. 2. The GenePattern software architecture** is based on flexible SOAP interfaces allowing multiple clients and programming languages to access a single underlying pipeline engine and module repository with built-in support for reproducible *in silico* research.
